# Supplementary material for: Bounding the efficiency gain of differentiable road pricing for EVs and GVs to manage congestion and emissions
Source: PLoS One. 2020 Jul 30;15(7):e0234204. doi: 10.1371/journal.pone.0234204 (PMC7392306; doi:10.1371/journal.pone.0234204)
Supplement: S2 Data — (CSV) [file pone.0234204.s002.csv]

	P	untolled E	tolled E	POAE
	0	68921	66143	1.042
0.5	0.1	62014	59520	1.0419
	0.2	55110	52889	1.042
	0.3	48202	46255	1.0421
	0.4	41295	39631	1.042
	0.5	34390	33004	1.042
	0.6	27492	26374	1.0424
	0.7	20582	19747	1.0423
	0.8	13687	13132	1.0423
	0.9	6782	6496	1.0441
0.75	0	106371	100218	1.0614
	0.1	95709	90181	1.0613
	0.2	85055	80135	1.0614
	0.3	74408	70097	1.0615
	0.4	63746	60053	1.0615
	0.5	53100	50019	1.0616
	0.6	42447	39976	1.0618
	0.7	31792	29974	1.06065
	0.8	21145	19905	1.0623
	0.9	10497	9871	1.0634
1	0	147779	137035	1.0784
	0.1	132966	123322	1.0782
	0.2	118176	109605	1.0782
	0.3	103374	95868	1.0783
	0.4	88583	82143	1.0784
	0.5	73784	68414	1.0785
	0.6	58992	54683	1.0788
	0.7	44200	40971	1.0788
	0.8	29404	27246	1.0792
	0.9	14613	13531	1.08
1.25	0	196341	155296	1.2643
	0.1	176651	140836	1.2543
	0.2	156998	124178	1.2643
	0.3	137346	108343	1.2677
	0.4	117695	93017	1.2653
	0.5	98042	77546	1.2643
	0.6	78392	62053	1.2633
	0.7	58745	46457	1.2645
	0.8	39095	30869	1.2665
	0.9	19447	15339	1.2678
1.5	0	254809	230868	1.1037
	0.1	229229	207710	1.1036
	0.2	203739	184613	1.1036
	0.3	178249	161472	1.1039
	0.4	152742	138391	1.1037
	0.5	127260	115293	1.1038
	0.6	101753	92176	1.1039
	0.7	76253	69070	1.104
	0.8	50761	45963	1.1044
	0.9	25266	22859	1.1053
1.75	0	326017	291295	1.1192
	0.1	293288	262098	1.119
	0.2	260669	232907	1.1192
	0.3	228063	203791	1.1191
	0.4	195442	174627	1.1192
	0.5	162816	145436	1.1195
	0.6	130211	116333	1.1193
	0.7	97594	87169	1.1196
	0.8	64982	58025	1.1199
	0.9	32366	28880	1.1207
2	0	414280	363467	1.1398
	0.1	372664	326984	1.1397
	0.2	331240	290587	1.1399
	0.3	289791	254270	1.1397
	0.4	248344	217922	1.1396
	0.5	206909	181531	1.1398
	0.6	165480	145849	1.1346
	0.7	124031	108790	1.1401
	0.8	82606	72436	1.1404
	0.9	41167	36070	1.1413
